# Supplementary material
Source: PubMed Central journal article supplement (PMC6696729)
Supplement: jamaophthalmol-137-1233-s001.pdf [file jamaophthalmol-137-1233-s001.pdf]

## Supplementary Online Content

Yotsukura E, Torii H, Inokuchi M, et al. Current prevalence of myopia and association of myopia with environmental factors among schoolchildren in Japan. *JAMA Ophthalmol*. Published online August 15, 2019.  
doi:10.1001/jamaophthalmol.2019.3103

**eFigure 1.** Flowchart of the Current Study

**eFigure 2.** The Prevalence of Myopia and High Myopia Among Elementary School Students

**eFigure 3.** The Axial Length and Prevalence of High Myopia Among Elementary School Students

**eFigure 4.** The Prevalence of Myopia Among Junior High School Students

**eFigure 5.** The Axial Length and Prevalence of High Myopia Among Junior High School Students

**This supplementary material has been provided by the authors to give readers additional information about their work.**

**eFigure 1. Flowchart of the Current Study**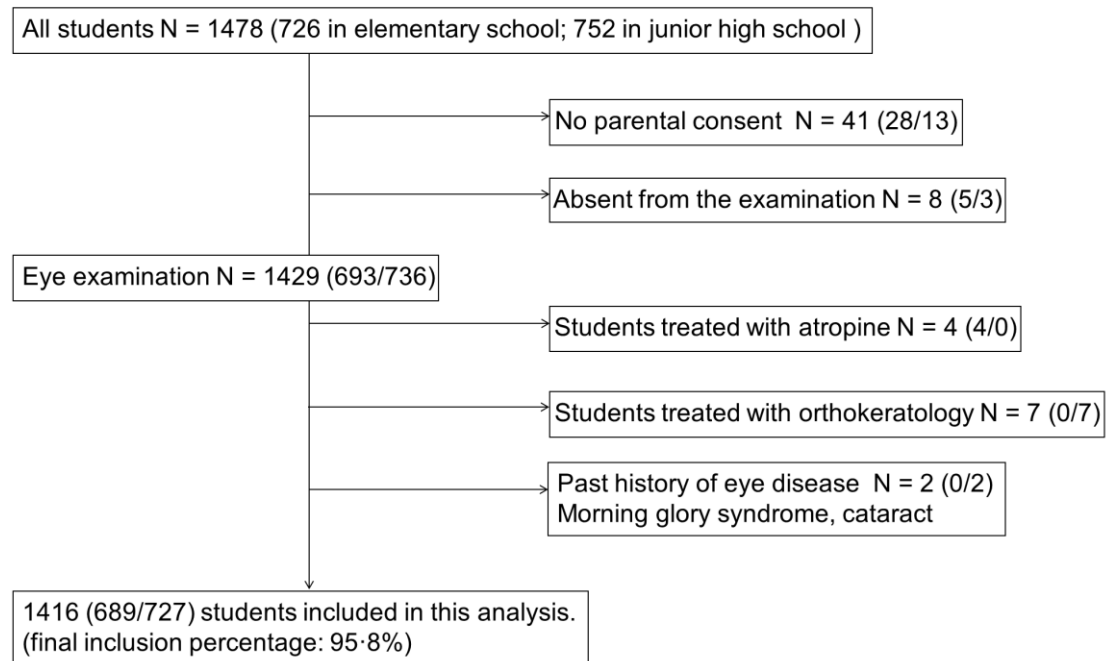

**eFigure 2.** The Prevalence of Myopia and High Myopia Among Elementary School Students

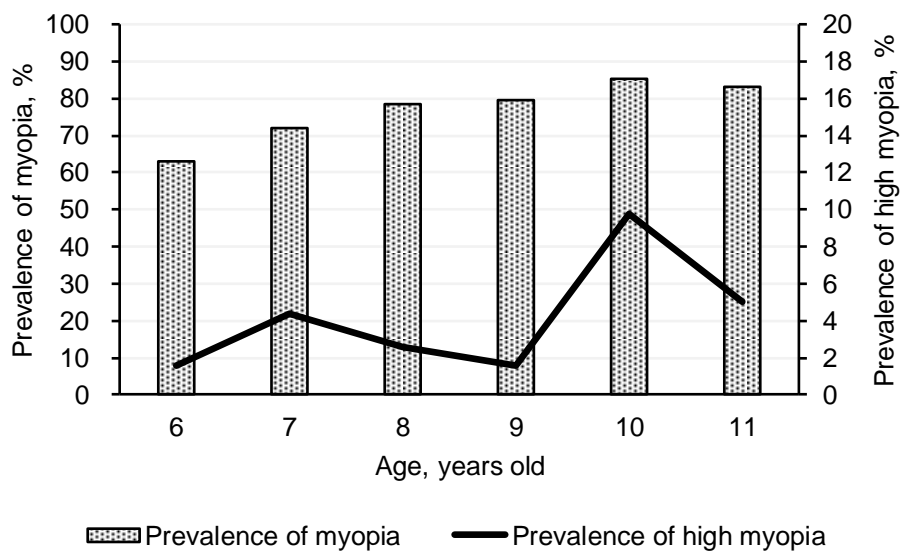

The prevalence of myopia (spherical equivalent  $\leq -0.5$  D) is 76.5% among all students and 63.1% for 6-year-olds. The prevalence of high myopia (spherical equivalent  $\leq -6.0$  D) is 4.0% among all students.

**eFigure 3.** The Axial Length and Prevalence of High Myopia Among Elementary School Students

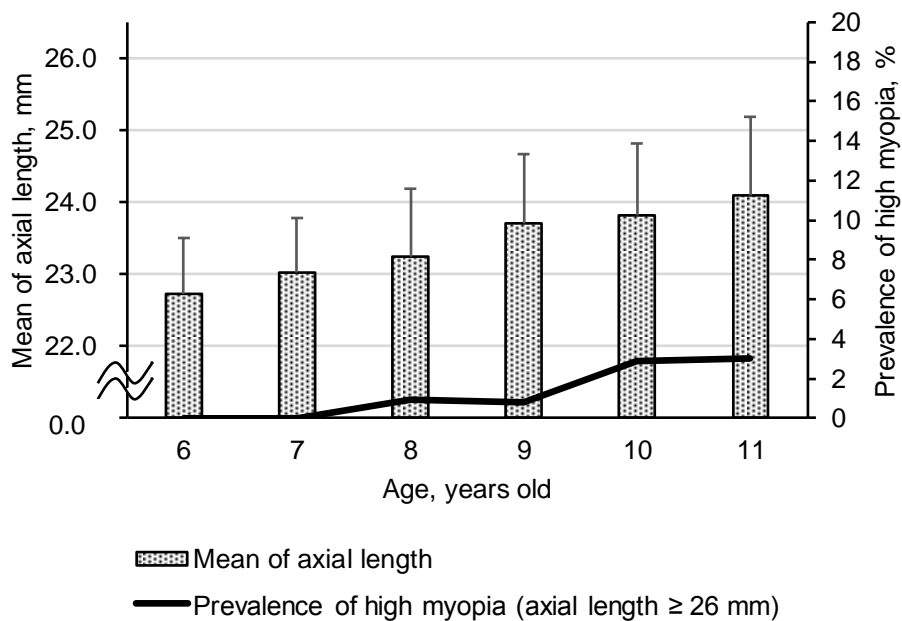

The prevalence of high myopia (axial length  $\geq 26.0$  mm) is 1.2% among all students. The data are expressed as the mean  $\pm$  standard deviation.

**eFigure 4.** The Prevalence of Myopia Among Junior High School Students

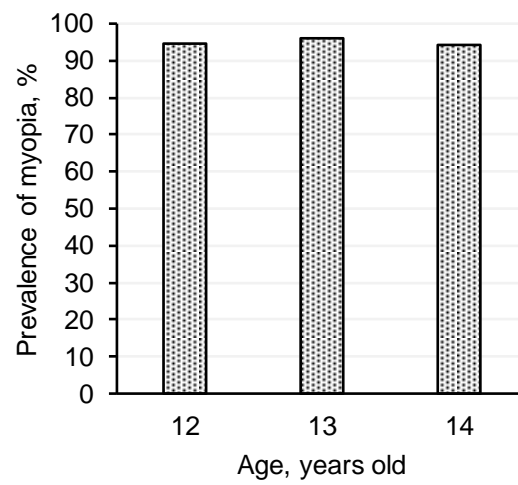

The prevalence of myopia is 94.9% among all students.

**eFigure 5.** The Axial Length and Prevalence of High Myopia Among Junior High School Students

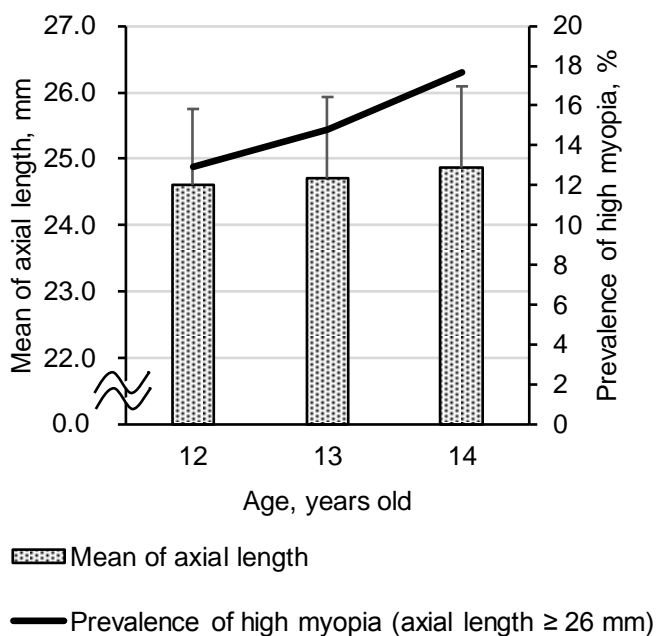

The prevalence of high myopia (axial length  $\geq$  26.0 mm) is 15.2% among all students. The data are expressed as the mean  $\pm$  standard deviation.
